# Supplementary material for: Climate Change Impacts on Ecological Connectivity of Marine Protected Areas in the Yangtze River Estuary and Adjacent Waters
Source: Research Square preprint supplement (doi:10.21203/rs.3.rs-7832411/v1), 2025-10-31
Supplement: Supplementary file 1 [file c60ad1648ee3a6c07bf27675.docx]

**Table S1: Definitions, Generation Methods, and Algorithm Settings for Habitat Suitability and Connectivity Variables**

| **Variable** | **Definition** | **How it was generated and processed** | **Algorithm Settings and Assumptions** |
| --- | --- | --- | --- |
| **Suitability** | Measures the appropriateness of a habitat for a species, based on environmental variables such as temperature, salinity, dissolved oxygen, etc. | Generated using **Species Distribution Models (SDMs)** based on environmental variables. Standardized to a 0–1000 scale, with higher values indicating more suitable conditions. | SDMs used: Maxent, Random Forest (RF), Generalized Linear Models (GLM), and others (Table 2). Model accuracy assessed using AUC, TSS, and Kappa values. Presence-only data used. |
| **Core Habitat** | A subset of suitable habitat that represents the most optimal areas for species survival and reproduction. | Defined as areas with suitability scores >750, representing highly suitable conditions. Derived from ensemble modeling outputs. | Core habitat thresholds were selected based on ensemble results and prior studies (Guisan and Zimmermann, 2000). |
| **Highly Suitable Habitat** | The most favorable habitat areas where species are predicted to thrive, with optimal environmental conditions. | Same as core habitat, based on suitability scores >750. Indicates maximum species habitat quality. | Threshold of suitability >750. Calculated using an ensemble of models (Maxent, RF, GLM). |
| **Ecological Corridor** | Pathways connecting fragmented habitats, allowing species to migrate or disperse. | Identified using **circuit theory** in **Linkage Mapper**, representing low-resistance pathways between ecological source areas. | Circuit theory models use resistance values based on environmental gradients (e.g., habitat suitability, temperature). |
| **Effective Resistance (Reff)** | A measure of migration difficulty between two habitat patches, accounting for all possible migration routes. | Calculated using circuit theory, with the resistance surface derived from SDMs. It quantifies the cumulative resistance across all potential migration paths. | Resistance surfaces were inverted from SDMs using the SDMToolbox and used in circuit theory models. High resistance = higher migration difficulty. |
| **Electric Current Density** | Relative measure of connectivity strength, representing the density of migration pathways between MPAs. | Generated using **Linkage Mapper** with circuit theory to simulate current density across ecological corridors. High current density indicates strong connectivity. | Linkage Mapper was used to integrate current density across 17 MPAs under different climate scenarios (SSP126, SSP585). |
| **Ecological Pinch Points** | Critical areas where migration corridors narrow, hindering species movement. | Identified from electric current density maps, focusing on areas with high resistance and low current density, which act as barriers to migration. | Pinch points are calculated based on **current density maps**. Areas with highest resistance and lowest connectivity are prioritized. |
